# Supplementary material
Source: PubMed Central journal article supplement (PMC7116532)
Supplement: EMS104487-supplement-Supplement.pdf [file EMS104487-supplement-Supplement.pdf]

# THE LANCET Neurology

## Supplementary appendix

This appendix formed part of the original submission. We post it as supplied by the authors.

Supplement to: Mehta AR, Abbott CM, Chandran S, Haley JE, for The Cajal Embroidery Project. The Cajal Embroidery Project: celebrating neuroscience. *Lancet Neurol* 2020; **19**: 979.

## Consortium members

**The Cajal Embroidery Project: a global collaboration celebrating the centenary of the Cajal Institute**

### Embroiderers

|                               | <b>Initials</b> | <b>Surname</b>  | <b>Country</b> |
|-------------------------------|-----------------|-----------------|----------------|
| <b>Cathy Abbott</b>           | C               | Abbott          | Scotland       |
| <b>Janice Barr</b>            | J               | Barr            | Scotland       |
| <b>Alison Beadnell</b>        | A               | Beadnell        | England        |
| <b>Karen Biggar</b>           | K               | Biggar          | Scotland       |
| <b>Nicky Brunger</b>          | N               | Brunger         | England        |
| <b>Mollie Bullick</b>         | M               | Bullick         | Scotland       |
| <b>Kim Burnett</b>            | K               | Burnett         | England        |
| <b>Annie B. Campbell</b>      | A.B.            | Campbell        | USA            |
| <b>Carol Coleman</b>          | C               | Coleman         | England        |
| <b>Louise Cox</b>             | L               | Cox             | England        |
| <b>Sally Cross</b>            | S               | Cross           | Scotland       |
| <b>Laura Curtis-Moss</b>      | L               | Curtis-Moss     | Scotland       |
| <b>Rebecca Devon</b>          | R               | Devon           | Scotland       |
| <b>Catriona Duncan</b>        | C               | Duncan          | Scotland       |
| <b>Michelle Duxbury</b>       | M               | Duxbury         | England        |
| <b>Amelia Edmondson-Stait</b> | A               | Edmondson-Stait | Scotland       |
| <b>Claire Edwards</b>         | C               | Edwards         | Australia      |
| <b>Liz Farmery</b>            | L               | Farmery         | England        |
| <b>Lindsey Forbes</b>         | L               | Forbes          | Scotland       |
| <b>Lorna Ginnell</b>          | L               | Ginnell         | Scotland       |
| <b>Griselda Goldsbrough</b>   | G               | Goldsbrough     | England        |
| <b>Jane Haley</b>             | J               | Haley           | Scotland       |
| <b>Helen Heggie</b>           | H               | Heggie          | Scotland       |
| <b>Jessica Heywood</b>        | J               | Heywood         | England        |
| <b>Eve Hindle</b>             | E               | Hindle          | Scotland       |
| <b>Akanksha Jain</b>          | A               | Jain            | Scotland       |
| <b>Marianne King</b>          | M               | King            | England        |
| <b>Mikaela Laine</b>          | M               | Laine           | Finland        |
| <b>Sarah MacGeorge</b>        | S               | MacGeorge       | England        |
| <b>Rebecca Madden</b>         | R               | Madden          | Scotland       |
| <b>Ruth McQuinn</b>           | R               | McQuinn         | Traveller      |
| <b>Anna Mikelsone</b>         | A               | Mikelsone       | Scotland       |
| <b>Diane Milne</b>            | D               | Milne           | Scotland       |
| <b>Brenda Murage</b>          | B               | Murage          | Scotland       |
| <b>Jane Murry</b>             | J               | Murray          | England        |
| <b>Anika Oellrich</b>         | A               | Oellrich        | England        |
| <b>Sally-Ann Parker</b>       | S-A             | Parker          | England        |
| <b>Emma Perkins</b>           | E               | Perkins         | Scotland       |

|                                |   |                 |           |
|--------------------------------|---|-----------------|-----------|
| <b>Janet Philp</b>             | J | Philp           | Scotland  |
| <b>Jennifer Pound</b>          | J | Pound           | England   |
| <b>Jane Redford</b>            | J | Redford         | Scotland  |
| <b>Liz Ribchester</b>          | E | Ribchester      | Scotland  |
| <b>Madhusmita Sahu</b>         | M | Sahu            | Finland   |
| <b>Vanessa Salazar Sanchez</b> | V | Salazar Sanchez | Scotland  |
| <b>Elaine Sandeman</b>         | E | Sandeman        | Scotland  |
| <b>Danny Schnitzler</b>        | D | Schnitzler      | Scotland  |
| <b>Diane Sherman</b>           | D | Sherman         | Scotland  |
| <b>Jayne Shipley</b>           | J | Shipley         | England   |
| <b>Carol Smith</b>             | C | Smith           | Scotland  |
| <b>Melanie Stefan</b>          | M | Stefan          | Scotland  |
| <b>Niki Stypidou</b>           | N | Stypidou        | Scotland  |
| <b>Alison Todd</b>             | A | Todd            | Scotland  |
| <b>Wendy Todd</b>              | W | Todd            | Australia |
| <b>Lisl Tudor</b>              | L | Tudor           | England   |
| <b>Paula Urrutia</b>           | P | Urrutia         | Germany   |
| <b>Caroline Watson</b>         | C | Watson          | Scotland  |
| <b>Emma Wilson</b>             | E | Wilson          | Scotland  |
| <b>Deanna Wolf</b>             | D | Wolf            | Scotland  |
| <b>Carol Wollaston</b>         | C | Wollaston       | Scotland  |
